# Supplementary material
Source: Springer Nature journal article supplement (https://www.springermedizin.de/resource/supplementary/12936_2008_670_MOESM8_ESM.pdf/9547964)

a

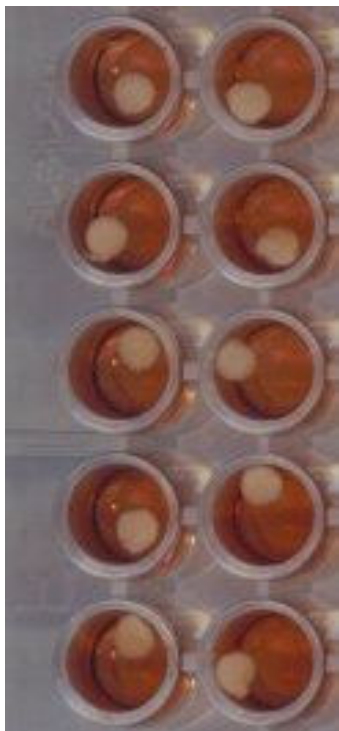

b

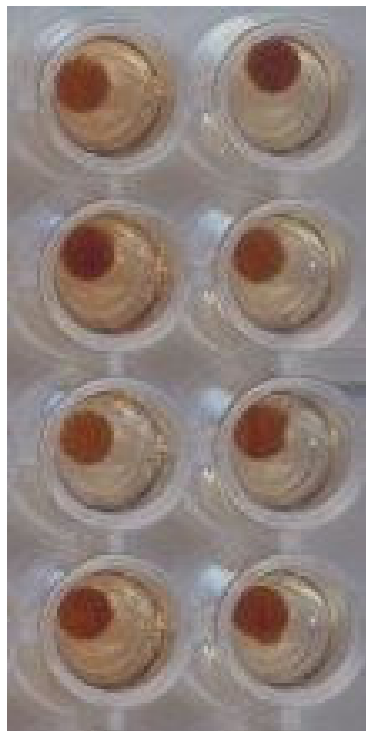

Supplement: MOESM8 [file 9547964]
